# Supplementary material
Source: Elsevier journal article supplement (https://www.sciencedirect.com/science/article/pii/S0210569122002248)
Supplement: mmc1 [file S0210569122002248:mmc1.pdf]

# Situación laboral de los intensivistas en sus primeros años de actividad asistencial

## JUSTIFICACIÓN Y OBJETIVO

En nuestro entorno, los intensivistas lideran la atención al paciente crítico siendo un modelo que ha demostrado ser eficiente y mejorar los resultados en salud. Este modelo requiere un ratio de atención y condiciones laborales adecuadas. Así, el trabajo a turnos, con guardias, requiere de una gestión específica con énfasis en el cuidado de los profesionales. Cuando esto no se realiza, afecta a la calidad de la atención a nuestros pacientes (seguridad del paciente, productividad y absentismo). También se ha demostrado que las condiciones inadecuadas se asocian a una mayor incidencia de accidentes "in itinere" o enfermedades crónicas como diabetes u obesidad. Además, derechos como la conciliación familiar quedan omitidos.

A pesar de la importancia de las condiciones laborales, es muy escasa la atención prestada en nuestros hospitales, sociedades científicas y demás instituciones. El futuro de la especialidad requiere de una adecuada gestión del talento y del bienestar de los profesionales durante los primeros años de actividad asistencial.

Por ello se plantea esta encuesta con el objetivo de conocer con mayor exactitud la situación laboral actual de los médicos intensivistas en todo el territorio nacional durante los primeros 10 años de especialidad para su análisis y búsqueda de posibles mejoras.

Fuentes: <https://www.nhsemployers.org/hswpg> <https://www.ficm.ac.uk/wicm>

...

## 1. Género

☐ Hombre

☐ Mujer

## 2. Año de finalización de residencia

Escriba su respuesta

## 3. Edad actual

Escriba su respuesta

## 4. Comunidad Autónoma de trabajo (puede seleccionar varias).

- ☐ Andalucía
- ☐ Aragón
- ☐ Principado de Asturias
- ☐ Islas Baleares
- ☐ Canarias
- ☐ Cantabria
- ☐ Castilla y León
- ☐ Castilla - La Mancha
- ☐ Cataluña
- ☐ Comunidad Valenciana
- ☐ Extremadura
- ☐ Galicia
- ☐ Comunidad de Madrid
- ☐ Región de Murcia
- ☐ Comunidad Foral de Navarra

- ☐ País Vasco
- ☐ La Rioja
- ☐ Ciudad autónoma de Ceuta
- ☐ Ciudad autónoma de Melilla

#### 5. Tipo de contrato HASTA enero de 2020 (puede seleccionar varios)

- ☐ Contrato temporal de jornada laboral
- ☐ Contrato temporal de guardias
- ☐ Contrato temporal combinado (guardias + jornada laboral)
- ☐ Contrato indefinido de jornada laboral
- ☐ Contrato indefinido de guardias
- ☐ Contrato indefinido combinado (guardias + jornada laboral)
- ☐ Beca
- ☐ En paro

#### 6. Tipo de contrato en los últimos 12 meses

- ☐ Contrato temporal de jornada laboral
- ☐ Contrato temporal de guardias
- ☐ Contrato temporal combinado (guardias + jornada laboral)
- ☐ Contrato indefinido de jornada laboral
- ☐ Contrato indefinido de guardias
- ☐ Contrato indefinido combinado (guardias + jornada laboral)
- ☐ Beca
- ☐ En paro

## 7. Número de meses en paro desde el final de la residencia

## 8. Número de empleadores hasta enero de 2020

## 9. Tipo de empleador (seleccionar todos los que correspondan):

- ☐ Sistema Nacional de Salud
- ☐ Instituto de investigación
- ☐ Empresa privada
- ☐ Empresa privada no asistencia (ej, industria)
- ☐ Beca laboral (industria)

## 10. Ámbito en el que desempeña su actividad asistencial (señale todos los que correspondan):

- ☐ Servicio de Medicina Intensiva
- ☐ Servicio de Urgencias
- ☐ Otros servicios hospitalarios
- ☐ Prehospitalaria

## 11. Número de guardias en promedio MENSUAL durante 2019

## 12. Número de guardias en promedio MENSUAL durante 2020

## 13. Máster

- ☐ Sí
- ☐ No
- ☐ Está cursando

## 14. Doctorado

- ☐ Sí
- ☐ No
- ☐ Está cursando

## 15. Número de contratos encadenados en los últimos años

## 16. Participación en proyectos de investigación financiados

- ☐ Sí
- ☐ No

## 17. Puntúe de 1-5 según el grado de acuerdo con los siguientes enunciados siendo 1 (muy en desacuerdo) y 5 (muy de acuerdo):

En mi servicio se da un clima favorable a la conciliación familiar: 1 ,2, 3, 4, 5

Escriba su respuesta

18. Puntúe de 1-5 según el grado de acuerdo con los siguientes enunciados siendo 1 (muy en desacuerdo) y 5 (muy de acuerdo).

Se favorece mi implicación en actividades docentes y de investigación más allá de la actividad asistencial: 1 ,2, 3, 4, 5

Escriba su respuesta

19. Puntúe de 1-5 según el grado de acuerdo con los siguientes enunciados siendo 1 (muy en desacuerdo) y 5 (muy de acuerdo).

Considero que mi salud ha empeorado desde que inicié la residencia: 1 ,2, 3, 4, 5

Escriba su respuesta

20. Puntúe de 1-5 según el grado de acuerdo con los siguientes enunciados siendo 1 (muy en desacuerdo) y 5 (muy de acuerdo).

Volvería a realizar la misma especialidad: 1 ,2, 3, 4, 5

Escriba su respuesta

21. ¿Tiene personas a su cargo?: menores de 14 años o personas dependientes (personas de edad avanzada, con discapacidad o familiares con una enfermedad grave):

☐ Sí

☐ NO

22. Encuentra dificultad para compatibilizar su trabajo con responsabilidades familiares y/o domésticas:

☐ Ninguna

☐ Alguna

☐ Bastante

☐ Mucha dificultad

23. ¿Qué tipo de medidas de conciliación considera que podrían ser aplicables y que le ayudarían a solucionar sus problemas de conciliación? (señale todos los que correspondan):

☐ Horario flexible de entrada y salida

☐ Reducción de jornada laboral

☐ Bolsa de horas

☐ Trabajo compartido

☐ elección de turnos por motivos familiares

☐ Ayudas económicas para el cuidado de hijos/as o personas dependientes

☐ Guardería en el centro de trabajo

☐ Salidas por emergencias (p.ej: en Suecia se contempla un número de horas anuales que se pueden usar para estos temas, como puede ser quedarse unos días en el domicilio mientras el familiar está enfermo, acudir a llevar al niño al pediatra, etc. )

24. ¿Ha pensado en cambiar de especialidad?

☐ Sí

☐ No

25. ¿Ha pensado en trabajar en el extranjero?

☐ Sí

☐ No

Enviar

No revele nunca su contraseña. [Notificar abuso](#)

Este contenido lo creó el propietario del formulario. Los datos que envíes se enviarán al propietario del formulario. Microsoft no es responsable de las prácticas de privacidad o seguridad de sus clientes, incluidas las que adopte el propietario de este formulario. Nunca des tu contraseña.

Con tecnología de Microsoft Forms |

El propietario de este formulario no ha proporcionado una declaración de privacidad sobre cómo utilizarán los datos de tus respuestas. No proporciones información personal o confidencial.

| [Términos de uso](#)
